# Supplementary material
Source: publisher figshare collection journal article supplement (https://acs.figshare.com/ndownloader/files/10473010)
Supplement: Supplementary file 1 [file 10473010]

## **Supporting Information**

### **Temperature-Responsive Anisotropic Slippery Surface for Smart Control of the**

#### **Droplet Motion**

*Lili Wang, Liping Heng\* and Lei Jiang*

Key Laboratory of Bio-Inspired Smart Interfacial Science and Technology of Ministry of Education, Beijing Key Laboratory of Bio-inspired Energy Materials and Devices, School of Chemistry, Beihang University, Beijing 100191, China.

Tel: (+86) 10-82621396; Fax: (+86) 10-8262 7566

E-mail: [henglp@iccas.ac.cn](mailto:henglp@iccas.ac.cn)

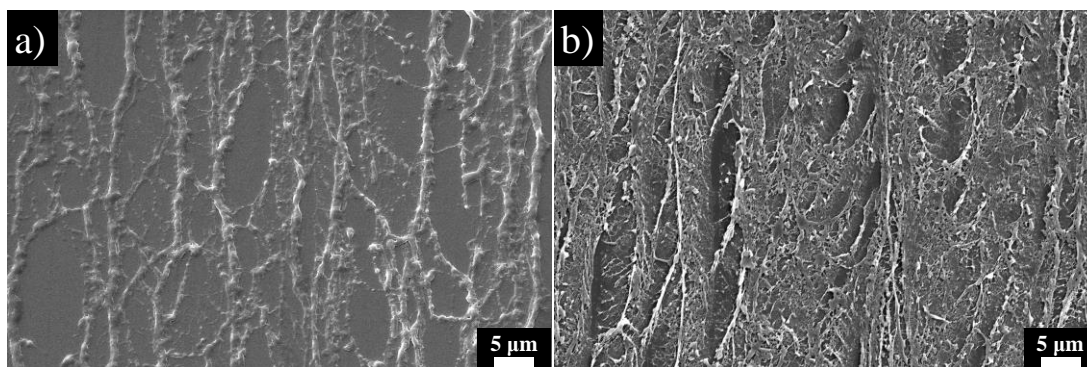

**Figure S1.** SEM images of PS films prepared by directional freeze-drying, using different concentrations of PS solutions: (a)  $1 \text{ mg mL}^{-1}$  and (b)  $3 \text{ mg mL}^{-1}$ .

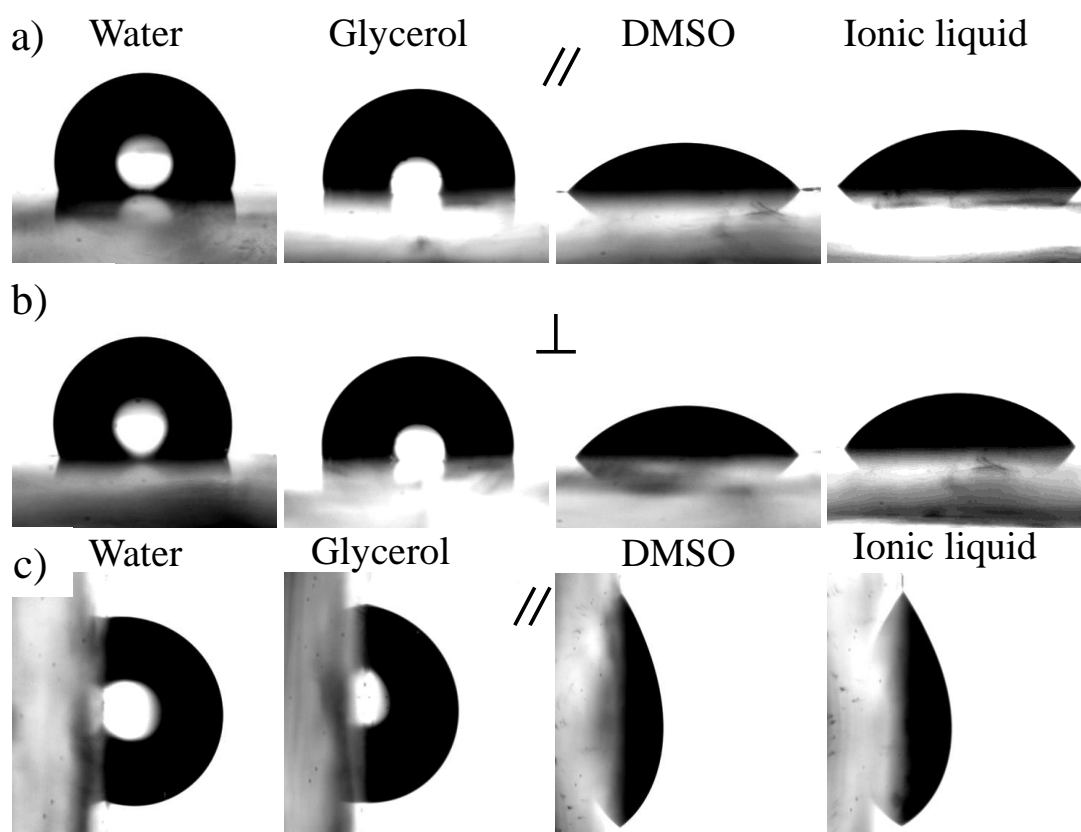

**Figure S2.** Anisotropic CA photographs of various liquid droplets ( $2 \text{ μL}$ ) on the directional porous PS films without paraffin: (a) parallel to the fiber direction (//) and (b) perpendicular to the fiber direction ( $\perp$ ). (c) Various liquid droplets ( $2 \text{ μL}$ ) on the directional porous PS films without paraffin did not slide even when the surfaces were tilted  $90^\circ$  in the parallel direction (//).

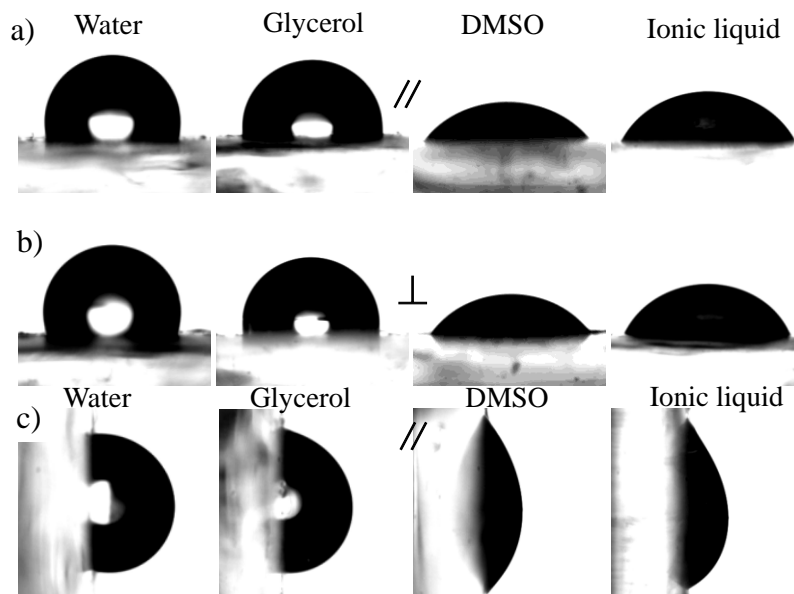

**Figure S3.** Anisotropic CA photographs of various liquid droplets (2  $\mu\text{L}$ ) on the directional porous PS films coated with paraffin at 25  $^{\circ}\text{C}$  ( $T < T_m$ ): (a) parallel to the fiber direction (//) and (b) perpendicular to the fiber direction ( $\perp$ ). (c) Various liquid droplets (2  $\mu\text{L}$ ) on the directional porous PS films coated with paraffin at 25  $^{\circ}\text{C}$  ( $T < T_m$ ) did not slide even when the surfaces were tilted 90 $^{\circ}$  in the parallel direction (//).

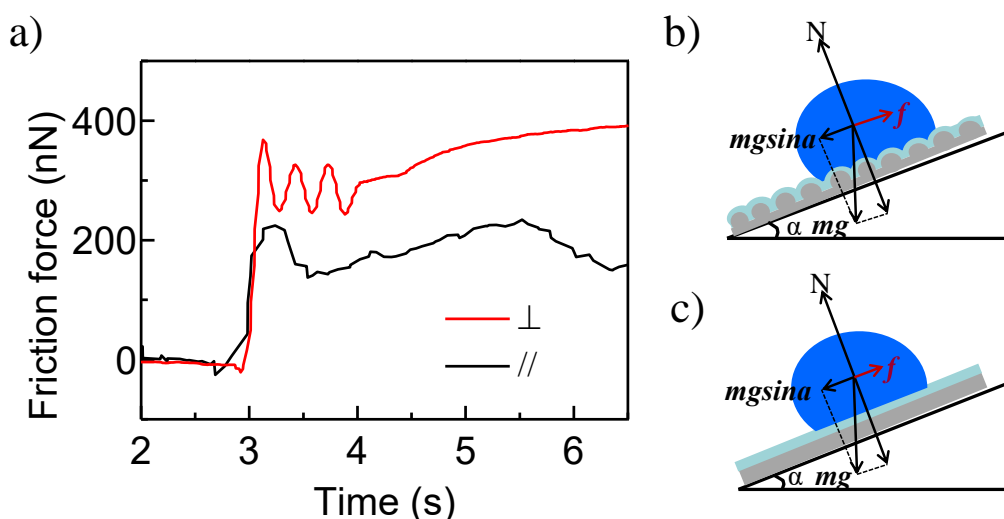

**Figure S4.** (a) Friction forces of the water drop in the perpendicular direction ( $\perp$ ) and the parallel direction (//) at 55  $^{\circ}\text{C}$ . The forces loaded on the droplet in (b) the perpendicular direction and (c) the parallel direction. The resistance  $f$  in the perpendicular direction is larger than that in the parallel direction, resulting in the larger SA in the perpendicular direction.

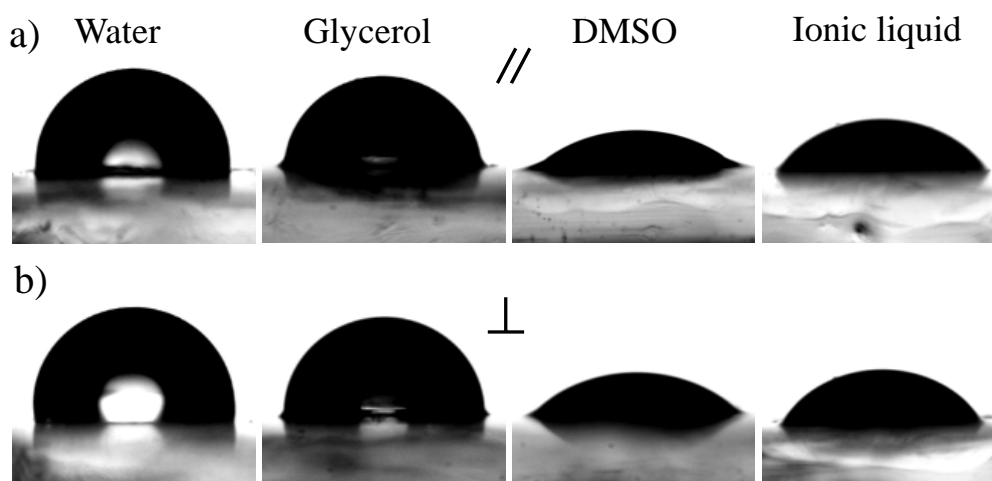

**Figure S5.** Anisotropic CA photos of various liquid droplets (2  $\mu\text{L}$ ) on the directional porous PS films coated with paraffin at 55  $^{\circ}\text{C}$  ( $T > T_m$ ): (a) parallel to the fiber direction (//) and (b) perpendicular to the fiber direction ( $\perp$ ).

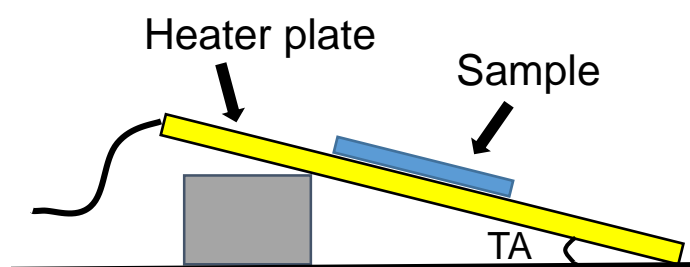

**Figure S6.** Schematic side-view depiction of the sample (glass slide or glass tube) on the heater plate.

**Table S1.** Anisotropic CAs of various liquid droplets (2  $\mu\text{L}$ ) on the porous PS films without paraffin.

| Liquid type  | CA //                   | CA $\perp$              | Surface tension (mN/m) | Viscosity coefficient (mPa·m) |
|--------------|-------------------------|-------------------------|------------------------|-------------------------------|
| Water        | $107.6 \pm 2.0^{\circ}$ | $113.7 \pm 1.6^{\circ}$ | 72.1                   | 0.89                          |
| Glycerol     | $97.3 \pm 1.2^{\circ}$  | $99.9 \pm 0.9^{\circ}$  | 62.7                   | 704.72                        |
| DMSO         | $47.2 \pm 1.0^{\circ}$  | $51.2 \pm 1.1^{\circ}$  | 43.6                   | 1.69                          |
| Ionic liquid | $51.6 \pm 1.7^{\circ}$  | $56.2 \pm 1.5^{\circ}$  | 32.8                   | 55.40                         |

**Table S2.** Anisotropic CAs of various liquid droplets (2  $\mu$ L) on the porous PS films coated with paraffin at 25 °C.

| Liquid type  | CA //                 | CA $\perp$            |
|--------------|-----------------------|-----------------------|
| Water        | $105.5 \pm 1.8^\circ$ | $110.2 \pm 2.9^\circ$ |
| Glycerol     | $97.8 \pm 2.8^\circ$  | $99.5 \pm 1.7^\circ$  |
| DMSO         | $51.6 \pm 1.5^\circ$  | $54.7 \pm 2.0^\circ$  |
| Ionic liquid | $63.7 \pm 1.7^\circ$  | $66.6 \pm 1.9^\circ$  |

**Table S3.** CAs and surface tensions of various test liquids and liquid paraffin and the calculated  $\Delta E$  in the parallel direction at 55 °C.

| Liquid A     | Liquid B        | $R$ | $\gamma_A$ | $\gamma_B$ | $\gamma_{AB}$ | $\theta_A$   | $\theta_B$   | $\Delta E_1$ | $\Delta E_2$ |
|--------------|-----------------|-----|------------|------------|---------------|--------------|--------------|--------------|--------------|
| Water        | Liquid paraffin | 2.8 | 66.6       | 26.5       | 38.3          | $93.8^\circ$ | $20.3^\circ$ | 43.7         | 122.1        |
| Glycerol     | Liquid paraffin | 2.8 | 59.2       | 26.5       | 32.4          | $91.2^\circ$ | $20.3^\circ$ | 40.7         | 105.8        |
| DMSO         | Liquid paraffin | 2.8 | 35.9       | 26.5       | 6.1           | $76.1^\circ$ | $20.3^\circ$ | 37.3         | 56.1         |
| Ionic liquid | Liquid paraffin | 2.8 | 30.5       | 26.5       | 2.8           | $77.2^\circ$ | $20.3^\circ$ | 47.9         | 54.7         |

**Table S4.** The calculated  $\Delta E$  in the perpendicular direction at 55 °C.

| Liquid A     | Liquid B        | $R$ | $\gamma_A$ | $\gamma_B$ | $\gamma_{AB}$ | $\theta_A$   | $\theta_B$   | $\Delta E_1$ | $\Delta E_2$ |
|--------------|-----------------|-----|------------|------------|---------------|--------------|--------------|--------------|--------------|
| Water        | Liquid paraffin | 3.7 | 66.6       | 26.5       | 38.3          | $93.8^\circ$ | $20.3^\circ$ | 70.1         | 148.5        |
| Glycerol     | Liquid paraffin | 3.7 | 59.2       | 26.5       | 32.4          | $91.2^\circ$ | $20.3^\circ$ | 64.2         | 129.3        |
| DMSO         | Liquid paraffin | 3.7 | 35.9       | 26.5       | 6.1           | $76.1^\circ$ | $20.3^\circ$ | 51.3         | 70.1         |
| Ionic liquid | Liquid paraffin | 3.7 | 30.5       | 26.5       | 2.8           | $77.2^\circ$ | $20.3^\circ$ | 64.2         | 71.0         |
